# Reporting guideline for interventional trials of primary and incisional ventral hernia repair

S. G. Parker <sup>1,\*</sup>, S. Halligan<sup>2</sup>, F. Berrevoet <sup>3</sup>, A. C. de Beaux<sup>4</sup>, B. East <sup>5</sup>, H. H. Eker<sup>6</sup>, K. K. Jensen <sup>7</sup>, L. N. Jorgensen<sup>7</sup>, A. Montgomery<sup>8</sup>, S. Morales-Conde <sup>9</sup>, M. Miserez <sup>10</sup>, Y. Renard<sup>11</sup>, D. L. Sanders<sup>12</sup>, M. Simons<sup>13</sup>, D. Slade<sup>14</sup>, J. Torkington<sup>15</sup>, S. Blackwell<sup>16</sup>, N. Dames<sup>17</sup>, A. C. J. Windsor<sup>1</sup>, and S. Mallett<sup>2</sup>

<sup>1</sup>Abdominal Wall Unit, General Surgery, University College London Hospital, London, UK

<sup>2</sup>Centre for Medical Imaging, University College London, London, UK

<sup>3</sup>Department of General and Hepatobiliary Surgery and Liver Transplantation, University Hospital Ghent, Ghent, Belgium

<sup>4</sup>Department of Surgery, Royal Infirmary of Edinburgh, Edinburgh, UK

<sup>5</sup>3rd Department of Surgery, Motol University Hospital, 1st and 2nd Medical Faculty of Charles University, Prague, Czech Republic

<sup>6</sup>Department of Surgery, Amsterdam University Medical Centre, Amsterdam, the Netherlands

<sup>7</sup>General Surgery, Digestive Disease Centre, Bispebjerg Hospital, University of Copenhagen, Copenhagen, Denmark

<sup>8</sup>Department of Surgery, Skåne University Hospital Malmö, Malmö, Sweden

<sup>9</sup>Unit of Innovation in Minimally Invasive Surgery, Department of Surgery, University Hospital Virgen del Rocío, University of Seville, Seville, Spain

<sup>10</sup>Department of Abdominal Surgery, University Hospitals of the Katholieke Universiteit Leuven, Leuven, Belgium

<sup>11</sup>Department of General, Digestive and Endocrine Surgery, Robert-Debré University Hospital, University of Reims Champagne-Ardenne, Reims, France

<sup>12</sup>Department of General and Upper Gastrointestinal Surgery, North Devon District Hospital, Barnstaple, UK

<sup>13</sup>Department of Surgery, Onze Lieve Vrouwe Gasthuis Hospital, Amsterdam, the Netherlands

<sup>14</sup>Intestinal Failure Unit, Salford Royal NHS Foundation Trust, Salford, UK

<sup>15</sup>Department of Colorectal Surgery, University Hospital of Wales, Cardiff, UK

<sup>16</sup>Patient Representative, Liverpool, UK

<sup>17</sup>Patient Representative, Glasgow, UK

\*Correspondence to: Abdominal Wall Unit, University College London Hospital, 235 Euston Road, London NW1 2BU, UK (e-mail: samgparker@nhs.net)

## Abstract

**Background:** Primary and incisional ventral hernia trials collect unstandardized inconsistent data, limiting data interpretation and comparison. This study aimed to create two minimum data sets for primary and incisional ventral hernia interventional trials to standardize data collection and improve trial comparison. To support these data sets, standardized patient-reported outcome measures and trial methodology criteria were created.

**Methods:** To construct these data sets, nominal group technique methodology was employed, involving 15 internationally recognized abdominal wall surgeons and two patient representatives. Initially a maximum data set was created from previous systematic and panellist reviews. Thereafter, three stages of voting took place: stage 1, selection of the number of variables for data set inclusion; stage 2, selection of variables to be included; and stage 3, selection of variable definitions and detection methods. A steering committee interpreted and analysed the data.

**Results:** The maximum data set contained 245 variables. The three stages of voting commenced in October 2019 and had been completed by July 2020. The final primary ventral hernia data set included 32 variables, the incisional ventral hernia data set included 40 variables, the patient-reported outcome measures tool contained 25 questions, and 40 methodological criteria were chosen. The best known variable definitions were selected for accurate variable description. CT was selected as the optimal preoperative descriptor of hernia morphology. Standardized follow-up at 30 days, 1 year, and 5 years was selected.

**Conclusion:** These minimum data sets, patient-reported outcome measures, and methodological criteria have allowed creation of a manual for investigators aiming to undertake primary ventral hernia or incisional ventral hernia interventional trials. Adopting these data sets will improve trial methods and comparisons.

## Introduction

Ventral hernias can be large and difficult to repair<sup>1</sup>. High recurrence rates after repair have attracted increased research interest over the past 20 years<sup>2</sup>. In response, a new surgical subspecialty has emerged, abdominal wall reconstruction, targeted to improved outcomes and reduced recurrence. Interventional trials

aim to advance surgical repair techniques and improve patient outcomes. However, they frequently collect data that are poorly defined and inconsistent, and report postoperative outcomes that are detected and/or measured in many different ways<sup>3,4</sup>. Such data are highly heterogeneous, which hampers comparisons by both narrative and systematic review and meta-analysis.

Received: October 30, 2020. Revised: March 2, 2021. Accepted: April 13, 2021

© The Author(s) 2021. Published by Oxford University Press on behalf of BJS Society Ltd. All rights reserved.

For permissions, please email: journals.permissions@oup.com

The aim was to construct a minimum data set for primary and incisional ventral hernia trials, thereby standardizing data collection and facilitating interpretation. These data sets contain defined preoperative, intraoperative, and postoperative variables for collection, and also standardized patient-reported outcome measures and methodological criteria.

## Methods

A full explanation and elaboration of this work is available online ([Appendix S1](#)). In summary, a consensus group of expert abdominal wall surgeons was formed and nominal group technique methods were used. Nominal group technology facilitates effective group decision-making by giving each individual an equal chance to provide input into a defined problem<sup>5</sup>. This methodology consists of four phases: silent generation of ideas, ideas sharing, group discussion, and voting and ranking. This was used to create the minimum data sets. Lead researchers acted as facilitators throughout and did not vote. Before study initiation, a maximum data set was assembled by a lead researcher from two previous systematic reviews<sup>3,4</sup>. This was then sent to panellists to scrutinize and supplement with additional variables that they felt important for ventral hernia trials (phase 1: silent generation of ideas). Next, at the European Hernia Society meeting in Hamburg, September 2019, panellists met face to face (phase 2: sharing ideas; phase 3: group discussion). Afterwards, panellists were sent the finalized maximum data set via electronic mail and proceeded to select variables for the minimum data sets by means of multiple rounds of voting (phase 4: voting and ranking). Voting rounds followed three stages. First panellists were asked to vote for the number of variables in each data set. They then voted on data set contents. Finally, they voted on variable definitions and detection methods.

[Fig. 1](#) shows the stages of minimum data set development, with use of the nominal group technique to guide the methodology.

## Results

### Panellist selection

All 15 expert hernia surgeons approached agreed to participate. Two patients of one of the authors also agreed, resulting in 17 panellists.

### Development of maximum data set

The two systematic reviews<sup>3,4</sup> contributed 245 variables. An additional 109 variables were added by panellists (phase 1: silent generation of ideas). Thirty variables were eliminated during face-to-face discussion, leaving 324 in the final maximum data set (phases 2 and 3: sharing ideas and group discussion).

### Voting and ranking

#### Stages 1 and 2: number of variables and variables included in data sets

After multiple rounds of voting and facilitator intervention, the group reached consensus on 32 preoperative, intraoperative, and postoperative variables for the primary ventral hernia data set; 40 preoperative, intraoperative, and postoperative variables for the incisional ventral hernia data set; 25 patient-reported outcome measures for both data sets; and 40 methodological criteria (phase 4: voting and ranking).

#### Stage 3: variable definitions and detection methods

Variable definitions were proposed by the facilitators. After review and feedback, two definitions were altered. The existing European Registry of Abdominal Wall Hernias definition of smoking was selected, and a new definition proposed for mesh infection. Panellists then selected their preferred variable detection methods. The chosen detection method for each variable can be found in column 3 of [Table 1](#). Overall, panellists chose CT as the optimal method for assessment of both primary and incisional ventral hernias before and after operation. Although CT was selected as the preferred method for preoperative

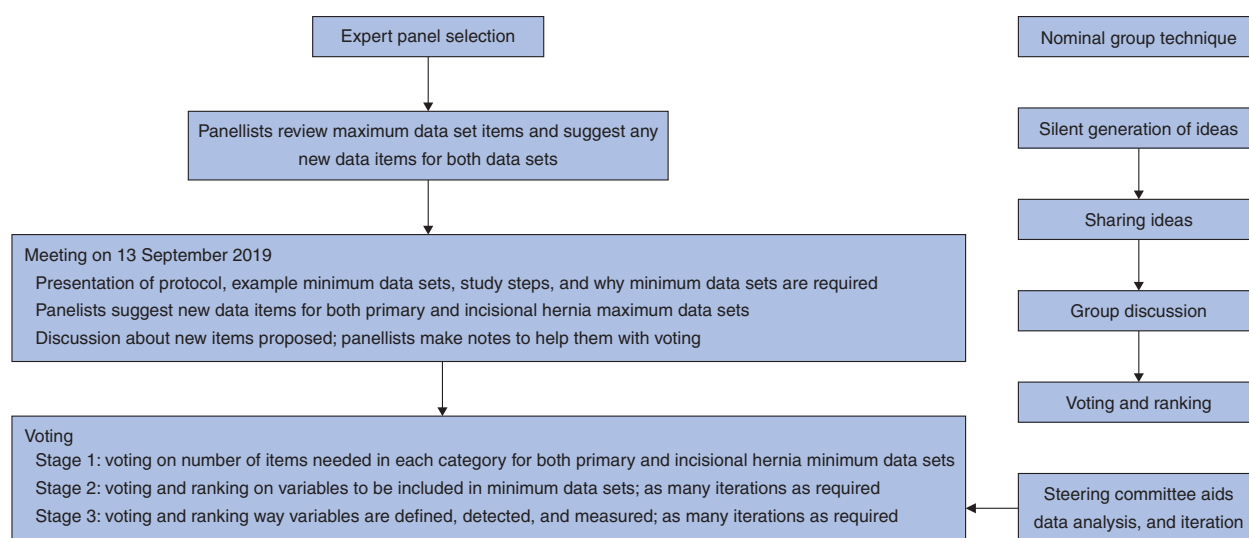

**Fig. 1** Flow chart showing the stages of minimum data set development

The nominal group technique was used to guide the methodology.

Table 1 Minimum data sets for primary and incisional ventral hernia

|                                          | Definition                                                                                                                                                                                                  | Detection method                                                                                                                    |
|------------------------------------------|-------------------------------------------------------------------------------------------------------------------------------------------------------------------------------------------------------------|-------------------------------------------------------------------------------------------------------------------------------------|
| <b>Preoperative variables</b>            |                                                                                                                                                                                                             |                                                                                                                                     |
| Age*                                     | Years since birth                                                                                                                                                                                           | Age on day of surgery                                                                                                               |
| Sex*                                     | M; F                                                                                                                                                                                                        | Sex on day of surgery                                                                                                               |
| BMI*                                     | Weight (kg)/height <sup>2</sup> (m <sup>2</sup> )                                                                                                                                                           | Calculated on day of surgery                                                                                                        |
| COPD*                                    | Diagnosis of COPD                                                                                                                                                                                           | Taking repeat COPD medication                                                                                                       |
| Smoker*                                  | EuraHS <sup>6</sup> (never smoker, ex-smoker > 12 months; occasional smoker; daily smoker)                                                                                                                  | Status on day of surgery                                                                                                            |
| Diabetes (types 1 or 2)*                 | Diagnosis of type 1 or 2 diabetes                                                                                                                                                                           | Taking repeat diabetic medication                                                                                                   |
| Immunosuppression/steroids*              | Diagnosis requiring immunosuppression or chemotherapy                                                                                                                                                       | Immunosuppression or chemotherapy taken regularly on day of surgery                                                                 |
| ASA fitness grade*                       | ASA fitness grade <sup>7</sup>                                                                                                                                                                              | Score on day of surgery                                                                                                             |
| <b>Hernia variables</b>                  |                                                                                                                                                                                                             |                                                                                                                                     |
| Hernia width*                            | Maximum defect width; EHS classification <sup>8</sup>                                                                                                                                                       | Preoperative CT                                                                                                                     |
| Loss of domain*                          | Volumetric measurement: Sabbagh Method <sup>9</sup>                                                                                                                                                         | Preoperative CT                                                                                                                     |
| European Hernia Score*                   | EHS classification; primary ventral hernia <sup>8</sup>                                                                                                                                                     | Clinical examination                                                                                                                |
| No. of hernia defects <sup>†</sup>       | No. of defects in anterior abdominal wall                                                                                                                                                                   | Preoperative CT                                                                                                                     |
| Divarification <sup>†</sup>              | Separation > 2 cm between rectus muscles <sup>10</sup>                                                                                                                                                      | Preoperative CT                                                                                                                     |
| Reducibility <sup>†</sup>                | Reducible; irreducible, no skin changes; irreducible, with skin changes; irreducible, causing bowel obstruction                                                                                             | Clinical examination +/- preoperative CT                                                                                            |
| Previous abdominal operations‡           | No. of midline, subcostal, and transverse incisions                                                                                                                                                         | Clinical records                                                                                                                    |
| No. of previous hernia repairs +/- mesh‡ | No. of previous hernia repairs and mesh <sup>11</sup>                                                                                                                                                       | Clinical records; ICAP nomenclature <sup>11</sup>                                                                                   |
| Previous wound infection (SSI)‡          | Previous SSI at site of hernia repair (yes; no)                                                                                                                                                             | Clinical records                                                                                                                    |
| Hernia defect area‡                      | Defect area where hernia sac passes through abdominal wall                                                                                                                                                  | Preoperative CT (area of an ellipse)                                                                                                |
| Stoma present‡                           | Abdominal wall ostomy present (yes; no)                                                                                                                                                                     | Clinical records; intraoperative details                                                                                            |
| Previous component separation‡           | Previous anterior component/transversus abdominis release                                                                                                                                                   | Clinical records; intraoperative details                                                                                            |
| Current mesh infection‡                  | Chronic infection, sinus or abscess at location of mesh                                                                                                                                                     | Purulent discharge or positive fluid culture                                                                                        |
| <b>Perioperative variables</b>           |                                                                                                                                                                                                             |                                                                                                                                     |
| Mode of surgery*                         | Mode of surgery (laparoscopic; open; robotic)                                                                                                                                                               | Intraoperative details                                                                                                              |
| Mesh or suture*                          | Method of repair                                                                                                                                                                                            | Intraoperative details                                                                                                              |
| Ventral Hernia Working Group assessment* | Low risk; co-morbid; contaminated; dirty <sup>12</sup>                                                                                                                                                      | Clinical records; intraoperative details                                                                                            |
| CDC assessment*                          | Clean; clean-contaminated; contaminated; dirty <sup>13</sup>                                                                                                                                                | Intraoperative details                                                                                                              |
| Preoperative botulinum toxin‡            | Preoperative injection of botulinum toxin to strap muscles                                                                                                                                                  | Clinical records                                                                                                                    |
| Component separation‡                    | Anterior component/transversus abdominis release                                                                                                                                                            | Intraoperative details                                                                                                              |
| Concomitant gastrointestinal procedure‡  | Bowel resection; cholecystectomy; stoma formation                                                                                                                                                           | Intraoperative details                                                                                                              |
| Mesh repair                              |                                                                                                                                                                                                             |                                                                                                                                     |
| Exact mesh name*                         | Trade name and mesh type (biological; biosynthetic; synthetic)                                                                                                                                              | Intraoperative details                                                                                                              |
| Mesh fixation technique*                 | Sutures or tacks (absorbable; non-absorbable)                                                                                                                                                               | Intraoperative details                                                                                                              |
| Position of mesh*                        | ICAP nomenclature <sup>11</sup>                                                                                                                                                                             | Intraoperative details                                                                                                              |
| Mesh size*                               | Intraoperative measurement (cm <sup>2</sup> )                                                                                                                                                               | Intraoperative details                                                                                                              |
| Bridging versus fascial closure*         | EHS definitions <sup>6</sup> : Anterior fascia completely closed or not completely closed                                                                                                                   | Intraoperative details                                                                                                              |
| Mesh overlap‡                            | Mesh overlap area/defect area ratio. Ellipse: Overlap = $\pi AB - \pi ab$ <sup>14</sup>                                                                                                                     | Intraoperativedetails                                                                                                               |
| Suture repair                            |                                                                                                                                                                                                             |                                                                                                                                     |
| Suture type*                             | Absorbable or non-absorbable material used                                                                                                                                                                  | Intraoperative details                                                                                                              |
| <b>Postoperative outcomes</b>            |                                                                                                                                                                                                             |                                                                                                                                     |
| SSI*                                     | CDC definition of SSI <sup>15</sup> : a) Superficial; b) deep; c) organ space                                                                                                                               | Wound infection involves a) skin and subcutaneous tissue b) muscle or fascia of the abdominal wall c) tissue deep to abdominal wall |
| SSO*                                     | Any adverse wound event. SSI, seroma, haematoma, fistula, etc. <sup>16</sup>                                                                                                                                | Clinical records; clinical examination                                                                                              |
| SSO requiring intervention*              | SSOs requiring procedural intervention <sup>17</sup>                                                                                                                                                        | Clinical records; clinical examination                                                                                              |
| Mesh infection*                          | Chronic infection, sinus or abscess at location of mesh                                                                                                                                                     | Purulent discharge or positive fluid culture                                                                                        |
| Chronic pain*                            | Pain lasting longer than 3 months after surgery                                                                                                                                                             | Clinical records                                                                                                                    |
| Hernia recurrence*                       | EHS definition <sup>6</sup> : a protrusion of the contents of the abdominal cavity or preperitoneal fat through a defect in the abdominal wall at the site of a previous repair of an abdominal wall hernia | Clinical examination +/- CT                                                                                                         |
| Clavien–Dindo grade*                     | Grades I–V. Grade IIIb: intervention under general anaesthesia <sup>18</sup>                                                                                                                                | Clinical records                                                                                                                    |
| 30-day reoperation rate*                 | Abdominal operation under general or regional anaesthesia within 30 days of primary ventral hernia repair                                                                                                   | Clinical records                                                                                                                    |

Variables marked with \* should be collected for primary and incisional ventral hernia trials, variables marked with † should be collected for primary ventral hernia trials only, and those marked with ‡ should be collected for incisional ventral hernia trials only. COPD, chronic obstructive pulmonary disease; EuraHS, European Registry of Abdominal Wall Hernias; EHS, European Hernia Society; ICAP, International Classification of Abdominal Wall Planes; SSI, surgical site infection; CDC, Centers for Disease Control and Prevention; SSO, surgical-site occurrence.

**Table 2 Patient-reported outcomes for interventional trials assessing ventral hernia repair**

| Pain at hernia site                                                                                                 | Score/response                                                                                                      |
|---------------------------------------------------------------------------------------------------------------------|---------------------------------------------------------------------------------------------------------------------|
| Pain at rest (lying down)                                                                                           | 0–10                                                                                                                |
| Pain during activities (walking, cycling, sports)                                                                   | 0–10                                                                                                                |
| Pain felt during the last week                                                                                      | 0–10                                                                                                                |
| <b>Restriction of activities because of pain or discomfort at hernia site</b>                                       |                                                                                                                     |
| Restriction in daily activities (inside the house)                                                                  | 0–10                                                                                                                |
| Restriction outside the house (walking, biking, driving)                                                            | 0–10                                                                                                                |
| Restriction during sports                                                                                           | 0–10                                                                                                                |
| Restriction during heavy labour                                                                                     | 0–10                                                                                                                |
| <b>Cosmetic discomfort</b>                                                                                          |                                                                                                                     |
| Shape of abdomen                                                                                                    | 0–10                                                                                                                |
| Site of hernia                                                                                                      | 0–10                                                                                                                |
| <b>General health questions</b>                                                                                     |                                                                                                                     |
| In general, would you say your health is                                                                            | Excellent; very good; good; fair; poor                                                                              |
| Moderate activities, such as moving a table, getting dressed, cooking, bowling, or playing golf                     | Yes, limited a lot; yes, limited a little; no, not limited at all                                                   |
| Climbing several flights of stairs                                                                                  | Yes, limited a lot; yes, limited a little; no, not limited at all                                                   |
| Due to physical health problems over the past 4 weeks, have you accomplished less than you would like?              | Yes; no                                                                                                             |
| Due to physical health problems over the past 4 weeks, have you been limited in the kind of work/other activities?  | Yes; no                                                                                                             |
| Due to emotional health problems over the past 4 weeks, have you accomplished less than you would like?             | Yes; no                                                                                                             |
| Due to emotional health problems over the past 4 weeks, have you been limited in the kind of work/other activities? | Yes; no                                                                                                             |
| During the past 4 weeks, how much did pain interfere with your normal work                                          | Not at all; a little bit; moderately; quite a bit, extremely                                                        |
| Over the past 4 weeks, have you felt calm and peaceful?                                                             | All of the time; most of the time; a good bit of the time; some of the time; a little of the time; none of the time |
| Over the past 4 weeks, did you have lots of energy?                                                                 | All of the time; most of the time; a good bit of the time; some of the time; a little of the time; none of the time |
| Over the past 4 weeks, have you felt downhearted and blue?                                                          | All of the time; most of the time; a good bit of the time; some of the time; a little of the time; none of the time |
| Over the past 4 weeks, how much have your physical or emotional problems interfered with your social activities?    | All of the time; most of the time; a good bit of the time; some of the time; a little of the time; none of the time |
| My mental health currently is                                                                                       | Awful; poor; fair; good; very good; excellent                                                                       |
| My sexual activity currently is                                                                                     | Awful; poor; fair; good; very good; excellent                                                                       |
| Having the operation was the right decision                                                                         | Strongly agree; agree; neither agree or disagree; disagree; strongly disagree                                       |
| I would go for the same choice if I had to do it over again                                                         | Strongly agree; agree; neither agree or disagree; disagree; strongly disagree                                       |

A combination of European Registry of Abdominal Wall Hernias quality-of-life score<sup>6</sup>, Short Form 12<sup>19</sup>, and expert patient questions.

primary ventral hernia characterization, panellists advise that, if there is no clinical indication beyond research, targeted low-dose CT should be used (phase 4: voting and ranking). Panelists selected standardized follow-up durations of 30 days, 1 year, and 5 years; post-operative outcomes should be measured at these time points.

The finalized minimum data sets complete with simplified definitions and detection methods are shown in [Table 1](#). A detailed description of these variables and their respective detection methods can be found in the online manuscript ([Appendix S1](#)). The chosen patient-reported outcome measures are shown in [Table 2](#) and the finalized methodological criteria selected in [Table 3](#).

## Discussion

Informed by systematic review and expert consensus, minimum data sets were constructed for interventional trials of

primary and incisional ventral hernias. Not only have two recent systematic reviews<sup>3,4</sup> indicated a requirement for minimum data sets, so too have calls from hernia surgeons, asking that a common language be used for outcome reporting and research<sup>26,27</sup>. Indeed, Debord and colleagues<sup>28</sup> called for 'an international task force to establish the definitions for wound events after hernia repair'. The present work has used an international group to both standardize postoperative wound events, and define preoperative patient variables, hernia characteristics, reported perioperative variables, postoperative outcomes, and patient-reported outcomes for ventral hernia trials. Trial methodology criteria have also been included to help create a handbook or manual to aid researchers planning ventral hernia trials. A greater wealth of standardized data will facilitate pooling and comparisons, including meta-analysis, so that new knowledge regarding optimal treatment options and outcome predictors has a more substantial evidence base.

**Table 3 Forty methodological recommendations for primary and incisional ventral hernia interventional trials****General**

Funding source and other support (such as supply of drugs or supplies), role of funder  
 Protocol location  
 Registered trial no.  
 Ethical approval (with reference no.)

**Introduction**

Background and rationale  
 Primary aim or objective (distinguishing prespecified from exploratory)  
 Additional objectives (distinguishing prespecified from exploratory)

**Methods**

Trial design  
 Important changes to methods after study commencement, with reasons  
 Trial setting (single centre/multicentre), names of centres where data will be collected  
 Eligibility, inclusion, and exclusion criteria for study participants  
 Intended recruitment and follow-up dates  
 Intervention and standard-care descriptions, with sufficient detail to allow replication  
 Primary outcome, with methods and references for detection and measurement  
 Secondary outcomes, with methods and references for detection and measurement  
 Methods of follow-up  
 Intended sample size and study power, and how these were determined  
 RCTs: method of generating random allocation sequence  
 RCTs: method of implementing random allocation  
 RCTs: method of concealment (blinding) of participants and care providers to intervention received  
 Methods of study group/arm participant allocation, highlighting inherent selection biases and any methods used to reduce bias where possible  
 Method of concealment (blinding) of outcome assessors to intervention received  
 Statistical methods for comparing groups; for primary and secondary outcomes  
 Statistical methods for additional analyses such as subgroup and adjusted analyses  
 Statistical methods for handling missing data

**Results**

Participant flow chart: for each group, the numbers of participants meeting inclusion criteria, assigned to intervention, receiving intervention, analysed for primary outcome (including reasons for non-participation at each step)  
 Study dates: start and finish of recruitment, end of follow-up  
 Table of baseline characteristics and preoperative variables for each intervention group or by main predictor  
 No. of participants eligible, included, and analysed  
 Non-adherence to intended protocol by group: number of participants, important changes to interventions, outcomes or follow-up

**Analysis**

For each group, no. of participants (denominator) included in each analysis and whether the analysis was by original assigned groups (intention to treat) or by treatment (per protocol).  
 For each primary and secondary outcome, results for each group, and the estimated effect size and its precision (such as 95% confidence interval)  
 Results of any other analyses, including subgroup analyses and adjusted analyses, distinguishing prespecified from exploratory. Report adjustment factors  
 All important harms or unintended effects by group: no., definition, method of collection, start, and duration  
 Follow-up by group: no. by method, length of follow-up (median)  
 No. of participants with missing data

**Discussion**

Summary of key results with reference to study objectives  
 Trial limitations, addressing sources of potential bias, imprecision  
 Interpretation consistent with results; balancing benefits and harms  
 Generalizability (external validity, applicability) of study findings

These criteria were devised using existing methodological tools: Downs and Black<sup>20</sup>, ROBINS-I<sup>21</sup>, CONSORT statement<sup>22</sup>, STROBE<sup>23</sup>, TIDieR checklist<sup>24</sup>, and Newcastle-Ottawa Scale<sup>25</sup>.

**Funding**

This work was funded by the UK National Institute for Health Research (NIHR) (grant RfPB PB-PG-0816-20005) and Allergan (Dublin, Ireland). Neither funders were involved in the planning, methodology, analysis or write up of the research. The views and opinions expressed by authors in this publication are those of the authors and do not necessarily reflect those of the National Health Service, NIHR or Department of Health. S.Halligan and S Mallett are also supported by the NIHR University College London Hospitals Biomedical Research Centre.

Disclosure: F. Berrevoet declares conflicts of interest not directly related to the submitted work; educational grants from Medtronic. A. C. de Beaux declares conflicts of interest not directly related to the submitted work; speaker for BD Bard and

Medtronic, trainer for Bard BD. K. K. Jensen declares conflicts of interest not directly related to the submitted work; speaker for Bard BD. L. N. Jorgensen declares conflicts of interest not directly related to the submitted work; educational grants from Bard BD and Medtronic. M. Miserez declares conflicts of interest not directly related to the submitted work; research grants from Medtronic and Duomed, research grant and speaker for Bard BD. Montgomery A. declares conflicts of interest not directly related to the submitted work; speaker for Bard BD. S. Morales-Conde declares conflicts of interest not directly related to the submitted work; speaker for Bard BD, educational work for Medtronic, Ethicon, Storz Medical, Olympus, Stryker Corporation, WL Gore Ltd, consultancy work for Dipro Medical. Y. Renard declares conflicts of interest not directly related to the submitted work; educational grants from Bard BD, Hartmann. D. L. Sanders declares



conflicts of interest not directly related to the submitted work; educational grant, speakers fee and fee for post-market surveillance from Medtronic, speakers fee and consultant for Bard BD. M. Simons declares conflicts of interest not directly related to the submitted work; educational/training grants from Intuitive. D. Slade declares conflicts of interest not directly related to the submitted work; educational grant from WL Gore Ltd, educational grant and speaker for Cook Medical Ltd. J. Torkington declares conflicts of interest not directly related to the submitted work; speaker and consultant for Medtronic. A. C. J. Windsor declares conflicts of interest not directly related to the submitted work; consultant advisor for TELA BIO; educational grants and speaker for: Bard BD, LifeCell and Cook. S. G. Parker, S. Halligan, B. East, H. H. Eker, S. Blackwell, N. Dames and S. Mallet declare no conflict of interest.

## Supplementary material

Supplementary material is available at BJS online.

## References

- Scheuerlein H, Settmacher U, Lenschow M, Rauchfuss F. Complex incisional hernias. *Arch Clin Gastroenterol* 2016;**2**: 017–026.
- Cobb WS, Warren JA, Ewing JA, Burnikel A, Merchant M, Carbonell AM. Open retromuscular mesh repair of complex incisional hernia: predictors of wound events and recurrence. *J Am Coll Surg* 2015;**220**:606–613.
- Parker SG, Wood CPJ, Butterworth JW, Boulton RW, Plumb AAO, Mallett S et al. A systematic methodological review of reported perioperative variables, postoperative outcomes and hernia recurrence from randomised controlled trials of elective ventral hernia repair: clear definitions and standardised datasets are needed. *Hernia* 2018;**22**: 215–226.
- Parker SG, Halligan S, Erotocritou M, Wood CPJ, Boulton RW, Plumb AAO et al. A systematic methodological review of non-randomised interventional studies of elective ventral hernia repair: clear definitions and a standardised minimum dataset are needed. *Hernia* 2019;**23**:859–872.
- Potter M, Gordon S, Hamer P. The nominal group technique: a useful consensus methodology in physiotherapy research. *NZ J Physiother* 2004;**32**:70–75.
- Muysoms F, Campanelli G, Champault GG, DeBeaux AC, Dietz UA, Jeekel J et al. EuraHS: the development of an international online platform for registration and outcome measurement of ventral abdominal wall hernia repair. *Hernia* 2012;**16**:239–250.
- Saklad M. Grading of patients for surgical procedures. *Anesthesiology* 1941;**2**:281–284.
- Muysoms FE, Miserez M, Berrevoet F, Campanelli G, Champault GG, Chelala E et al. Classification of primary and incisional abdominal wall hernias. *Hernia* 2009;**13**:407–414.
- Parker SG, Halligan S, Liang MK, Muysoms FE, Adrales GL, Boutall A et al. Definitions for loss of domain: an international Delphi consensus of expert surgeons. *World J Surg* 2020;**44**: 1070–1078.
- Weinpold R, Kockerling F, Bittner R, Conze J, Fortelny R, Koch A et al. Classification of rectus diastasis—a proposal by the German Hernia Society (DHG) and the International Endohernia Society (IEHS). *Front Surg* 2019;**6**:1–6.
- Parker SG, Halligan S, Liang MK, Muysoms FE, Adrales GL, Boutall A et al. International classification of abdominal wall planes (ICAP) to describe mesh insertion for ventral hernia repair. *Br J Surg* 2020;**107**:209–217.
- Breuing K, Butler CE, Ferzoco S, Franz M, Hultman CS, Kilbridge JF et al.; Ventral Hernia Working Group. Incisional ventral hernias: review of the literature and recommendations regarding the grading and technique of repair. *Surgery* 2010;**148**:544–558.
- Garner JS. CDC prevention guidelines: guideline for prevention of surgical wound infections. *Infect Control* 1986;**7**:193–200.
- Tulloh B, de Beaux A. Defects and donuts: the importance of the mesh : defect area ratio. *Hernia* 2016;**20**:893–895.
- Centers for Disease Control and Prevention. Surgical site infection (SSI) event. In: *National Healthcare Safety Network (NHSN) Patient Safety Component Manual*. 2020, 1–34. [https://www.cdc.gov/nhsn/pdfs/validation/2020/pcsmanual\\_2020-508.pdf](https://www.cdc.gov/nhsn/pdfs/validation/2020/pcsmanual_2020-508.pdf).
- Haskins IN, Horne CM, Krpata DM, Prabhu AS, Tastaldi L, Perez AJ et al. A call for standardization of wound events reporting following ventral hernia repair. *Hernia* 2018;**22**:729–736.
- Baucom RB, Ousley J, Oyefule OO, Stewart MK, Phillips SE, Browman KK et al. Evaluation of long-term surgical site occurrences in ventral hernia repair: implications of preoperative site independent MRSA infection. *Hernia* 2016;**20**:701–710.
- Dindo D, Demartines N, Clavien PA. Classification of surgical complications. *Ann Surg* 2004;**240**:205–213.
- Jenkinson C, Layte R. Development and testing of the UK SF-12 (short form health survey). *J Health Serv Res Policy* 1997;**2**:14–18.
- Downs S, Black N. The feasibility of creating a checklist for the assessment of the methodological quality of health care interventions. *J Epidemiol Community Health* 1998;**52**: 377–384.
- Sterne JA, Hernán MA, Reeves BC, Savović J, Berkman ND, Viswanathan M et al. ROBINS-I: a tool for assessing risk of bias in non-randomised studies of interventions. *BMJ* 2016;**355**:1–7.
- Schulz KF, Altman DG, Moher D; Consort Group. CONSORT 2010 statement: updated guidelines for reporting parallel group randomised trials. *Development* 2010;**63**:834–840.
- von Elm E, Altman D, Egger M, Pocock SJ, Gøtzsche P, Vandenbroucke JP; STROBE Initiative. The Strengthening of Reporting of Observational Studies in Epidemiology (STROBE) statement: guidelines for reporting. *Ann Intern Med* 2007;**147**: 573–578.
- Hoffmann TC, Glasziou PP, Boutron I, Milne R, Perera R, Moher D et al. Better reporting of interventions: template for intervention description and replication (TIDieR) checklist and guide. *BMJ* 2014;**348**:g1687.
- Wells GA, Shea B, O'Connell D, Peterson J, Welch V, Losos M et al. *The Newcastle–Ottawa Scale (NOS) for Assessing the Quality of Nonrandomized Studies in Meta-Analyses*. Ottawa: Ottawa Research Institute, 2008.
- Muysoms FE, Deerenberg EB, Peeters E, Agresta F, Berrevoet F, Campanelli G et al. Recommendations for reporting outcome results in abdominal wall repair: results of a consensus meeting in Palermo, Italy, 28–30 June 2012. *Hernia* 2013;**17**:423–433.
- Schumpelick V, Kingsnorth AN. Panel discussions; classification. In: V Schumpelick, AN Kingsnorth (eds), *Incisional hernia*. Berlin: Springer Publishing, 1999, 491–492.
- DeBord J, Novitsky Y, Fitzgibbons R, Miserez M, Montgomery A. SSI, SSO, SSE, SSOPI: the elusive language of complications in hernia surgery. *Hernia* 2018;**22**:737–738.
